# Supplementary material for: Active Potential of Bacterial Cellulose-Based Wound Dressing: Analysis of Its Potential for Dermal Lesion Treatment
Source: MDPI journal article supplement (doi:10.3390/pharmaceutics14061222), 2022-06-08
Supplement: s1 [file s1]

## Supplementary Material

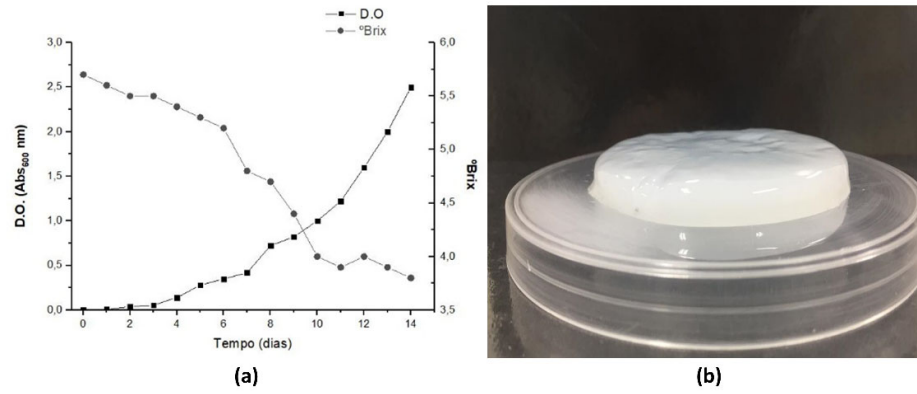

**Figure S1.** (a) Bacterial cellulose production kinetics determined from bacterial growth ( $OD_{Abs500nm}$ ) and total soluble solids content ( $^{\circ}Brix$ ) during 14 days of static culture; (b) Purified cellulose membrane after alkaline treatment.

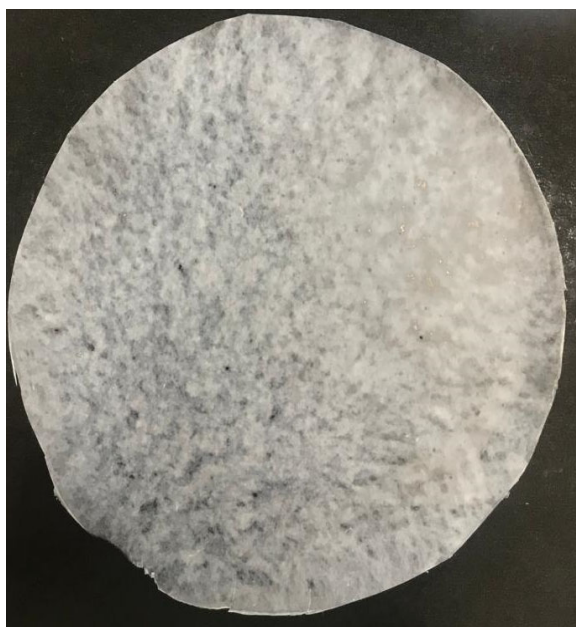

**Figure S2.** Original image of wound dressing F1.

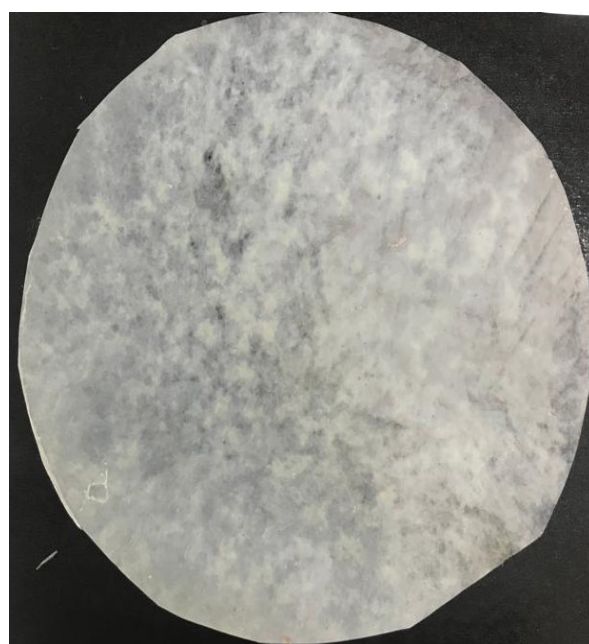

**Figure S3.** Original image of wound dressing F2.

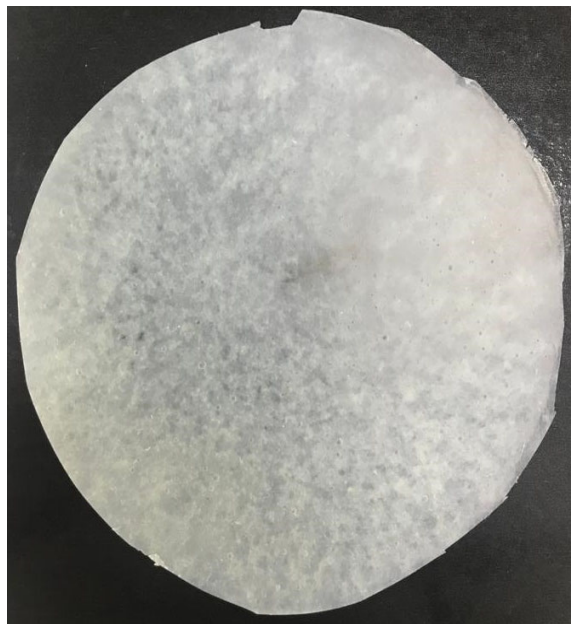

**Figure S4.** Original image of wound dressing F3.

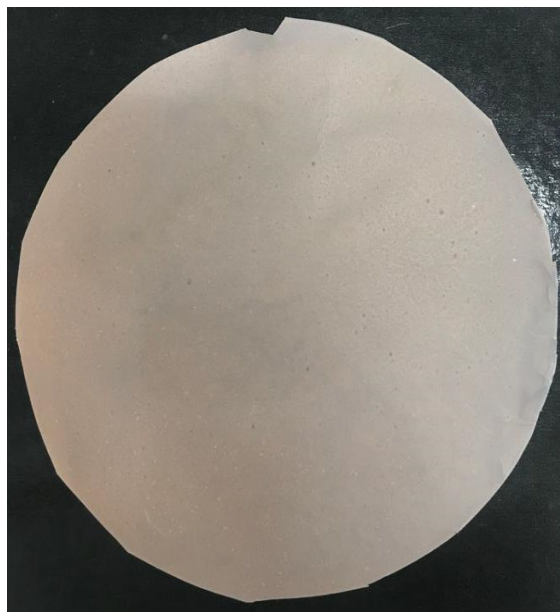

**Figure S5.** Original image of wound dressing F4.

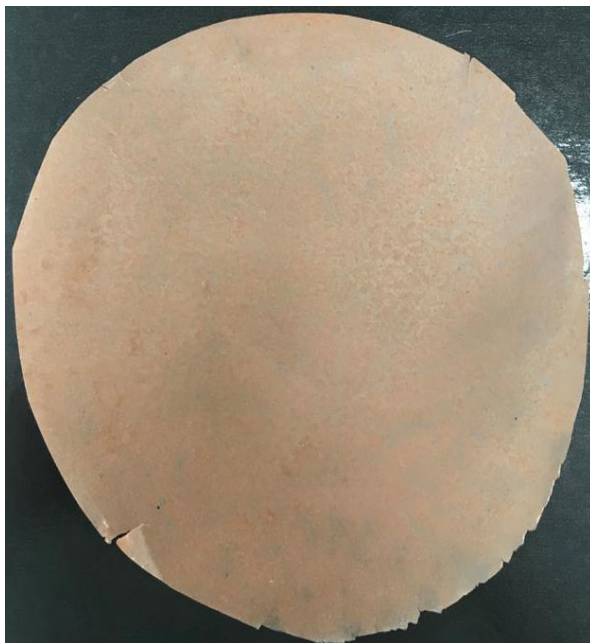

**Figure S6.** Original image of wound dressing F5.

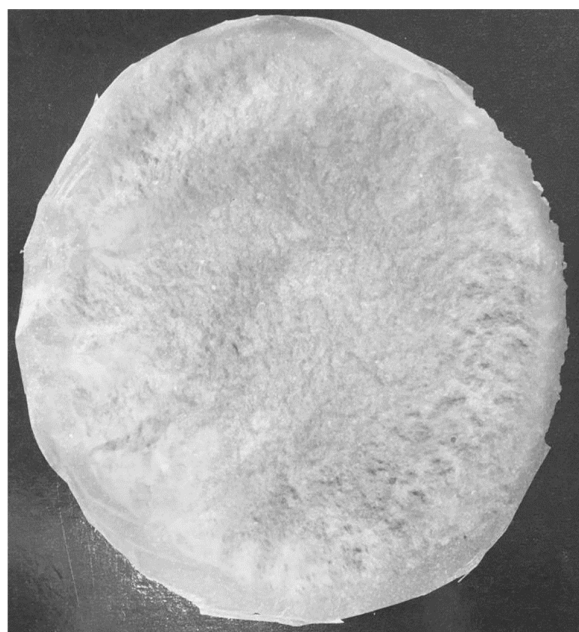

**Figure S7.** Original image of wound dressing F6.

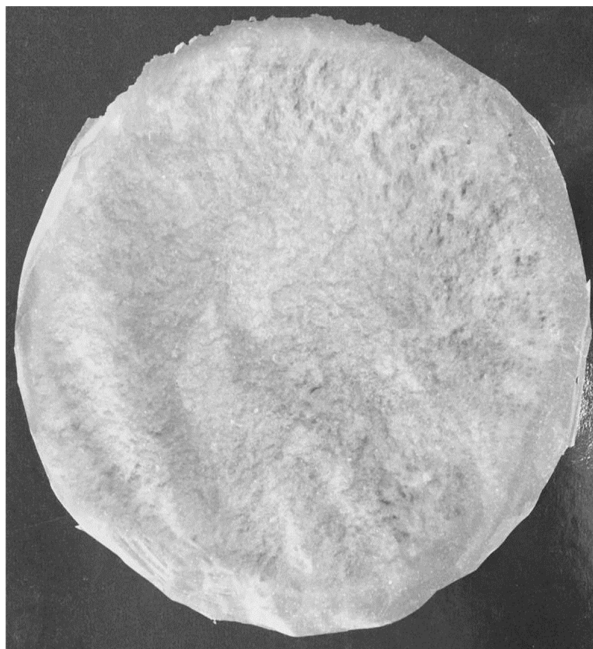

**Figure S8.** Original image of wound dressing F7.

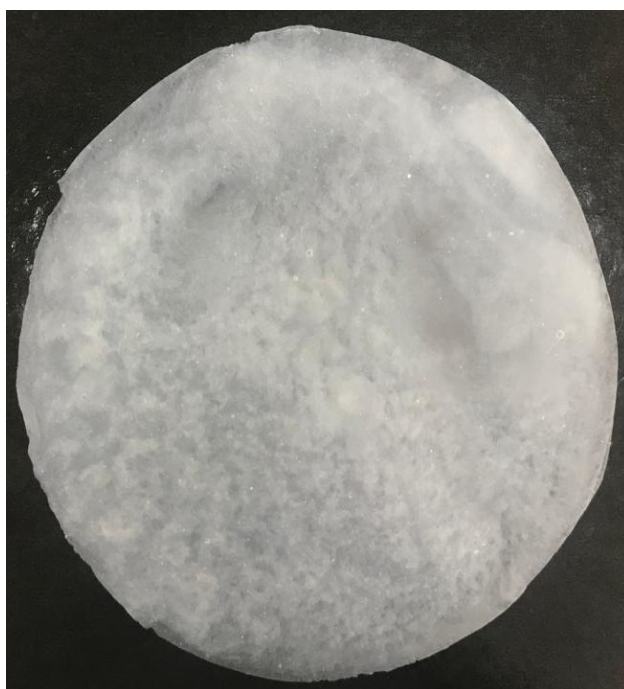

**Figure S9.** Original image of wound dressing F8.

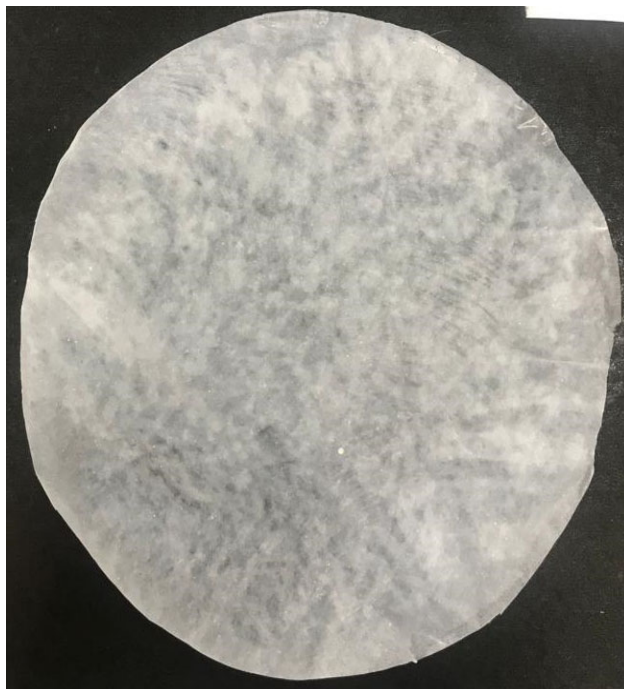

**Figure S10.** Original image of wound dressing F9.

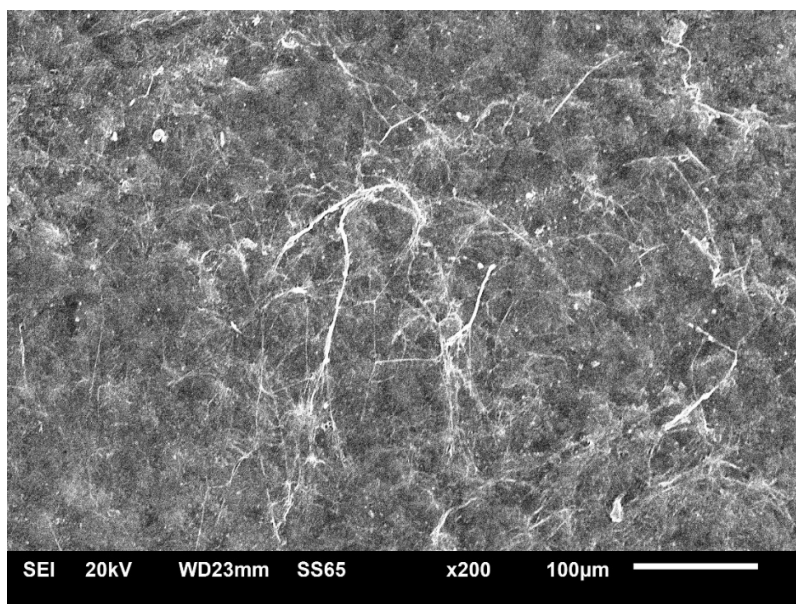

**Figure S11.** Original format of the scanning electron microscopy surface micrograph of the surface of the F1 wound dressing.

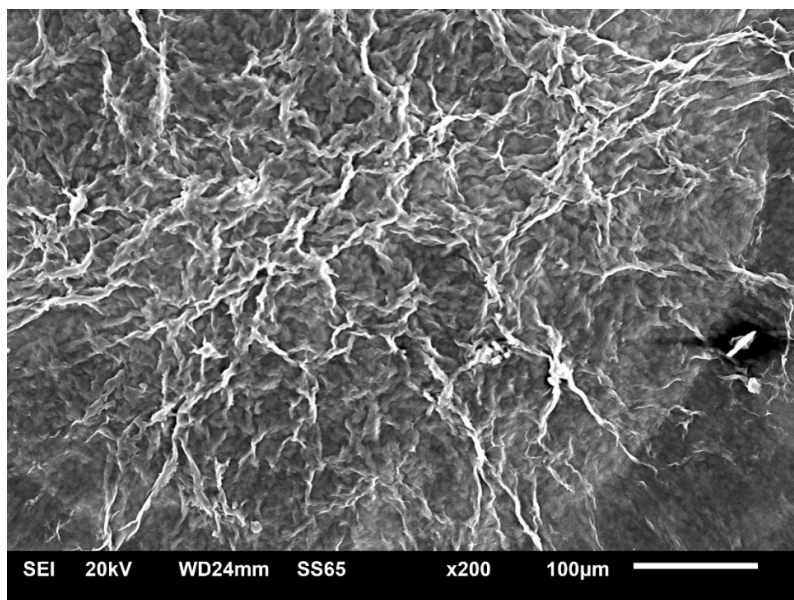

**Figure S12.** Original format of the scanning electron microscopy surface micrograph of the surface of the F2 wound dressing.

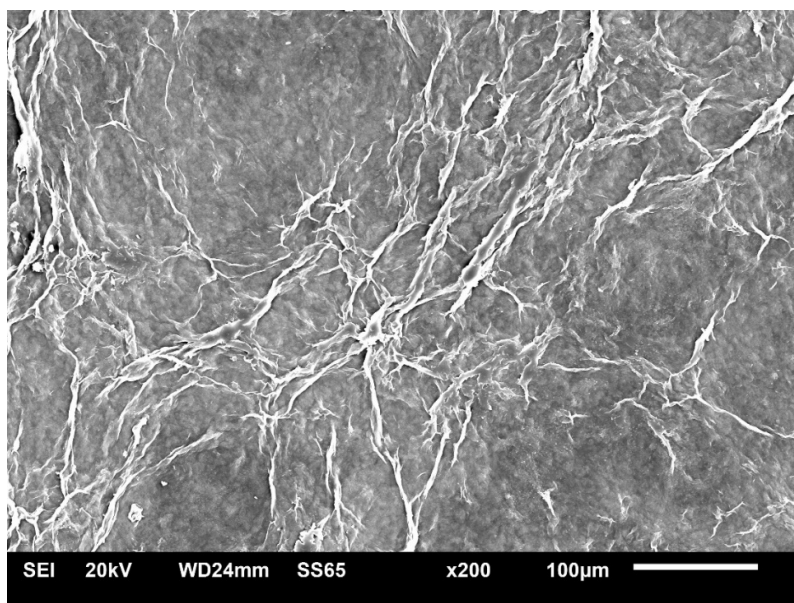

**Figure S13.** Original format of the scanning electron microscopy surface micrograph of the surface of the F3 wound dressing.

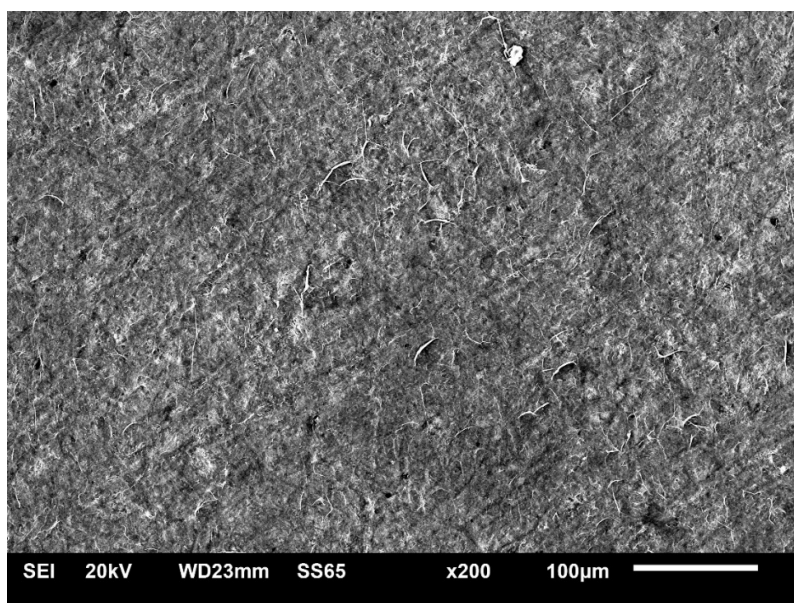

**Figure S14.** Original format of the scanning electron microscopy surface micrograph of the surface of the F4 wound dressing.

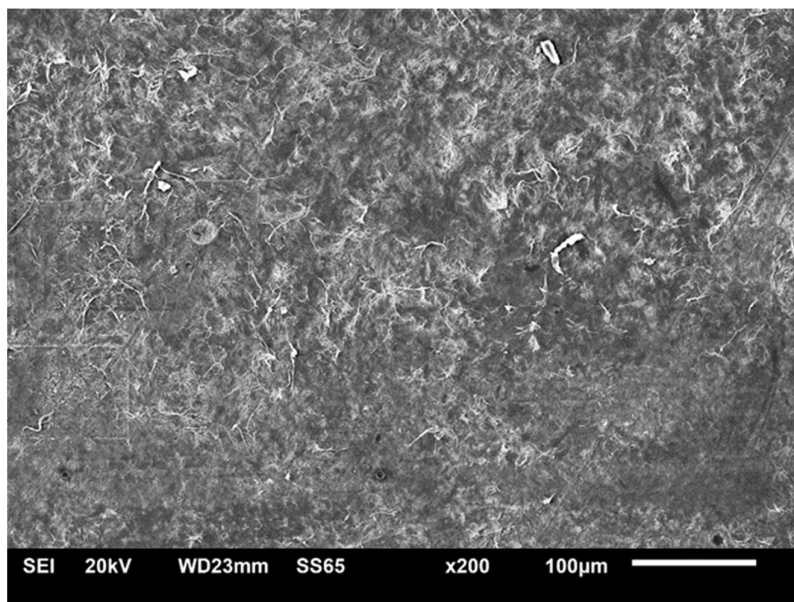

**Figure S15.** Original format of the scanning electron microscopy surface micrograph of the surface of the F5 wound dressing.

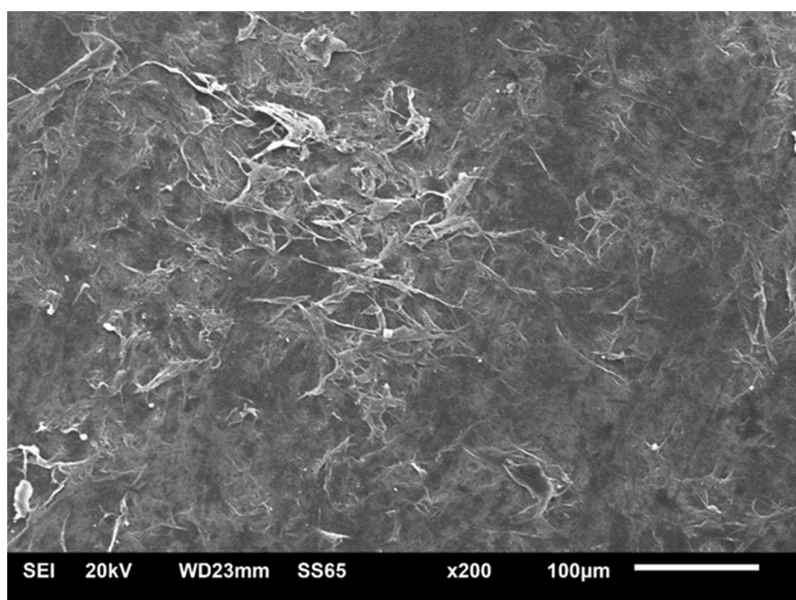

**Figure S16.** Original format of the scanning electron microscopy surface micrograph of the surface of the F6 wound dressing.

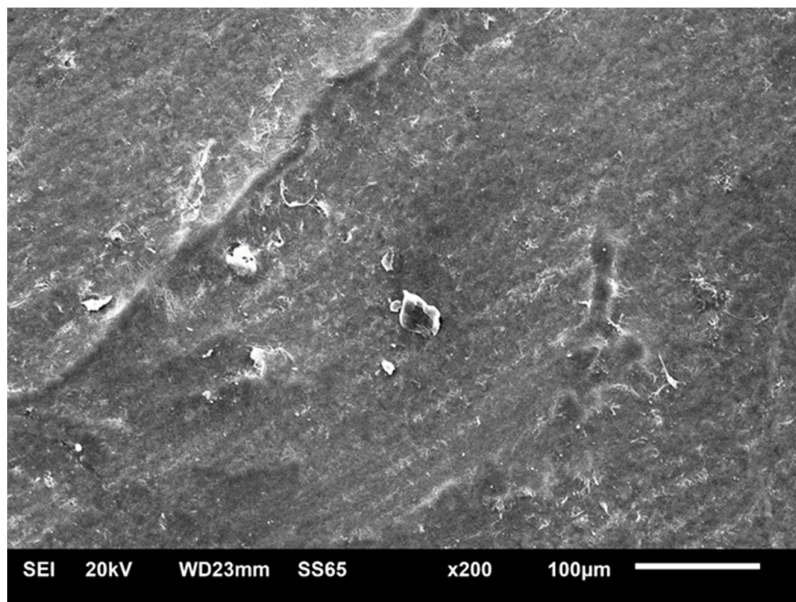

**Figure S17.** Original format of the scanning electron microscopy surface micrograph of the surface of the F7 wound dressing.

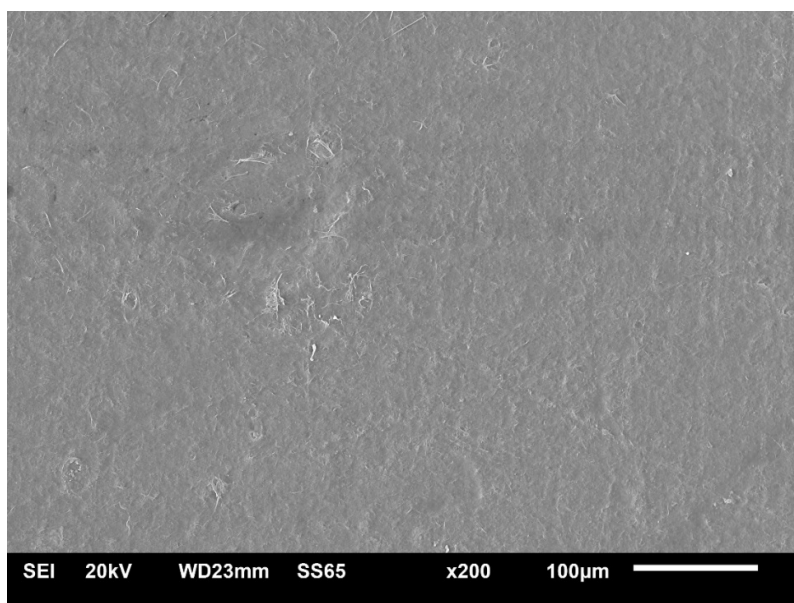

**Figure S18.** Original format of the scanning electron microscopy surface micrograph of the surface of the F8 wound dressing.

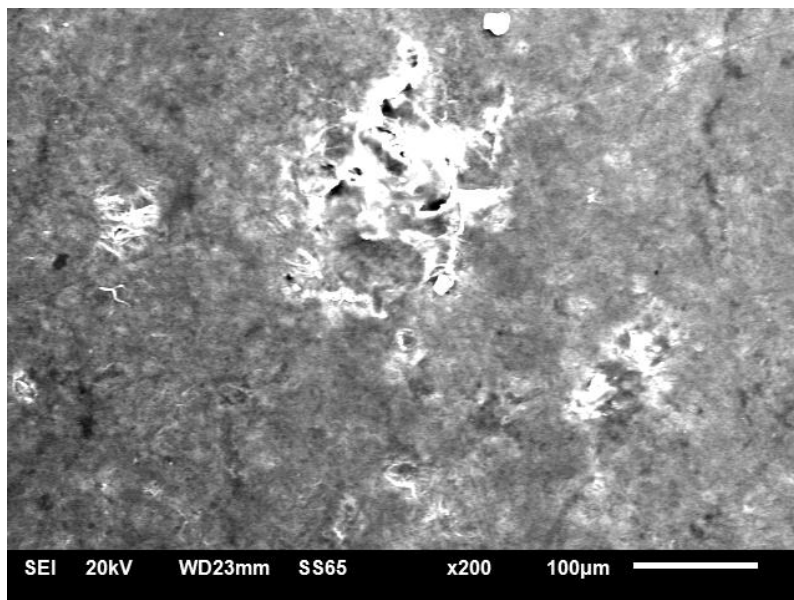

**Figure S19.** Original format of the scanning electron microscopy surface micrograph of the surface of the F9 wound dressing.

**Table S1.** Optical, Physical, barrier, and mechanical properties, as well as TFC, TPC and antioxidant activity of nine wound dressings based on bacterial cellulose and different active substances (ethanolic extract of green and red propolis, *p*-coumaric acid and biochanin A). No significant difference between values with the same superscript letter (<sup>a,b,c,d</sup>) in the same row ( $p > 0.05$ ), according to the Tukey test with 95% confidence.

| Tests                                              | Samples                   |                               |                           |                                |                                           |                                          |                           |                                           |                                          |
|----------------------------------------------------|---------------------------|-------------------------------|---------------------------|--------------------------------|-------------------------------------------|------------------------------------------|---------------------------|-------------------------------------------|------------------------------------------|
|                                                    | F1                        | F2                            | F3                        | F4                             | F5                                        | F6                                       | F7                        | F8                                        | F9                                       |
| Transparency<br>( $T_{600} \cdot \text{mm}^{-1}$ ) | 31.80±2.569 <sup>e</sup>  | 33.80±2.228 <sup>de</sup>     | 28.59±0.908 <sup>e</sup>  | 87.71±8.771 <sup>ab</sup>      | 58.43±9.237 <sup>b</sup>                  | 53.99±8.861 <sup>cd</sup>                | 94.50±1.798 <sup>c</sup>  | 93.53±11.301 <sup>a</sup><br><sub>b</sub> | 110.62±12.07<br><sub>7<sup>a</sup></sub> |
| Opacity<br>( $A_{500} \cdot \text{mm}^{-1}$ )      | 50.48±0.151 <sup>a</sup>  | 34.54±3.207 <sup>bc</sup>     | 39.45±1.004 <sup>b</sup>  | 29.85±1.171 <sup>c</sup>       | 41.63±2.947 <sup>b</sup>                  | 42.40±6.381 <sup>a</sup><br><sub>b</sub> | 35.95±2.489 <sup>bc</sup> | 34.31±2.817 <sup>bc</sup>                 | 28.43±1.804 <sup>c</sup>                 |
| Grammage<br>( $\text{g} \cdot \text{cm}^{-2}$ )    | 0.006±0.001 <sup>ab</sup> | 0.009±0.003 <sup>a</sup>      | 0.007±0.001 <sup>ab</sup> | 0.008±0.001 <sup>ab</sup>      | 0.009±0.001 <sup>a</sup>                  | 0.008±0.001 <sup>a</sup><br><sub>b</sub> | 0.004±0.001 <sup>b</sup>  | 0.006±0.001 <sup>ab</sup>                 | 0.005±0.001 <sup>b</sup>                 |
| Thickness<br>(mm)                                  | 0.029±0.001 <sup>bc</sup> | 0.023±0.001 <sup>c</sup>      | 0.029±0.004 <sup>bc</sup> | 0.024±0.001 <sup>c</sup>       | 0.034±0.006 <sup>b</sup>                  | 0.029±0.004 <sup>bc</sup>                | 0.031±0.006 <sup>b</sup>  | 0.033±0.005 <sup>b</sup>                  | 0.046±0.006 <sup>a</sup>                 |
| $a_w$                                              | 0.354±0.010 <sup>bc</sup> | 0.344±0.012 <sup>bcd</sup>    | 0.360±0.001 <sup>b</sup>  | 0.324±0.001 <sup>cde</sup>     | 0.338±0.008 <sup>bcd</sup>                | 0.435±0.029 <sup>a</sup>                 | 0.455±0.011 <sup>a</sup>  | 0.314±0.007 <sup>de</sup>                 | 0.292±0.003 <sup>e</sup>                 |
| Water solubility<br>(%)                            | 6.25±0.000 <sup>e</sup>   | 32.89±7.292 <sup>bcd</sup>    | 33.89±7.978 <sup>bc</sup> | 34.63±6.258 <sup>bc</sup>      | 11.04±1.204 <sup>e</sup>                  | 44.49±6.969 <sup>b</sup>                 | 65.58±4.073 <sup>a</sup>  | 28.54±1.628 <sup>cd</sup>                 | 18.97±1.012 <sup>de</sup>                |
| Moisture<br>Content Index<br>(%)                   | 27.44±10.819 <sup>c</sup> | 70.32±3.576 <sup>ab</sup>     | 65.38±9.093 <sup>ab</sup> | 62.75±3.179 <sup>ab</sup>      | 58.33±15.362 <sup>a</sup><br><sub>b</sub> | 66.97±0.755 <sup>a</sup><br><sub>b</sub> | 84.87±2.270 <sup>a</sup>  | 64.96±1.567 <sup>ab</sup>                 | 56.36±2.421 <sup>b</sup>                 |
| Swelling Index<br>(%)                              | 48.93±6.020 <sup>c</sup>  | 240.52±43.694<br><sub>b</sub> | 234±12.222 <sup>bc</sup>  | 169.83±23.752<br><sub>bc</sub> | 202.03±10.184<br><sub>bc</sub>            | 202.90±6.862<br><sub>bc</sub>            | 405.55±4.811 <sup>a</sup> | 185.85±12.962<br><sub>bc</sub>            | 175.44±5.196<br><sub>bc</sub>            |
| WVTR                                               | 7.86±1.530 <sup>c</sup>   | 33.36±1.488 <sup>a</sup>      | 38.11±5.762 <sup>a</sup>  | 8.78±0.577 <sup>c</sup>        | 8.66±0.678 <sup>c</sup>                   | 19.42±0.261 <sup>b</sup>                 | 11.79±0.805 <sup>c</sup>  | 9.173±0.642 <sup>c</sup>                  | 11.84±1.769 <sup>c</sup>                 |

|                                                   |                             |                             |                             |                             |                             |                           |                                        |                             |                            |
|---------------------------------------------------|-----------------------------|-----------------------------|-----------------------------|-----------------------------|-----------------------------|---------------------------|----------------------------------------|-----------------------------|----------------------------|
| (g.m <sup>2</sup> .day <sup>-1</sup> )            |                             |                             |                             |                             |                             |                           |                                        |                             |                            |
| WPV<br>(g.mm/m <sup>2</sup> .day.P<br>a)          | 2.29±0.444 <sup>e</sup>     | 7.48±0.329 <sup>b</sup>     | 10.30±0.195 <sup>a</sup>    | 2.32±0.155 <sup>e</sup>     | 2.45±0.189 <sup>e</sup>     | 6.64±0.196 <sup>b</sup>   | 5.68±0.860 <sup>c</sup>                | 2.50±0.176 <sup>e</sup>     | 3.74±0.560 <sup>d</sup>    |
| Maximum<br>Tensile Strength<br>(MPa)              | 3.00±1.276 <sup>ab</sup>    | 3.14±0.229 <sup>ab</sup>    | 2.01±0.351 <sup>bcd</sup>   | 4.15±0.701 <sup>a</sup>     | 2.97±0.933 <sup>ab</sup>    | 0.67±0.163 <sup>de</sup>  | 0.53±0.043 <sup>e</sup>                | 1.01±0.676 <sup>cde</sup>   | 2.30±0.590 <sup>bc</sup>   |
| Elongation<br>(%)                                 | 132.20±35.057 <sub>bc</sub> | 165.11±15.196 <sub>bc</sub> | 204.50±28.861 <sub>ab</sub> | 136.34±25.093 <sub>bc</sub> | 130.90±11.457 <sub>bc</sub> | 99.13±0.548 <sup>c</sup>  | 262.39±104.39 <sub>8<sup>a</sup></sub> | 147.67±65.324 <sub>bc</sub> | 137.62±34.31 <sub>bc</sub> |
| Flavonoids<br>(mgQE.g <sup>-1</sup> )             | 0.05±0.003 <sup>f</sup>     | 12.03±0.152 <sup>d</sup>    | 17.43±0.153 <sup>c</sup>    | 24.30±0.871 <sup>b</sup>    | 39.16±0.072 <sup>a</sup>    | 0.07±0.004 <sup>f</sup>   | 0.07±0.001 <sup>f</sup>                | 1.19±0.066 <sup>e</sup>     | 1.51±0.005 <sup>e</sup>    |
| Phenolic<br>Compounds<br>(mgGAE.g <sup>-1</sup> ) | 0.00 <sup>g</sup>           | 380.43 <sup>d</sup>         | 857.34 <sup>c</sup>         | 1084.10 <sup>b</sup>        | 1228.33 <sup>a</sup>        | 0.04 <sup>e</sup>         | 0.40 <sup>e</sup>                      | 0.02 <sup>f</sup>           | 0.02 <sup>f</sup>          |
| DPPH<br>(%)                                       | 86.76±4.152 <sup>a</sup>    | 56.26±4.085 <sup>d</sup>    | 55.73±2.218 <sup>d</sup>    | 32.93±4.026 <sup>e</sup>    | 21.23±3.453 <sup>f</sup>    | 58.90±1.212 <sup>cd</sup> | 58.20±5.729 <sup>cd</sup>              | 75.13±2.742 <sup>b</sup>    | 68.96±5.130 <sup>bc</sup>  |

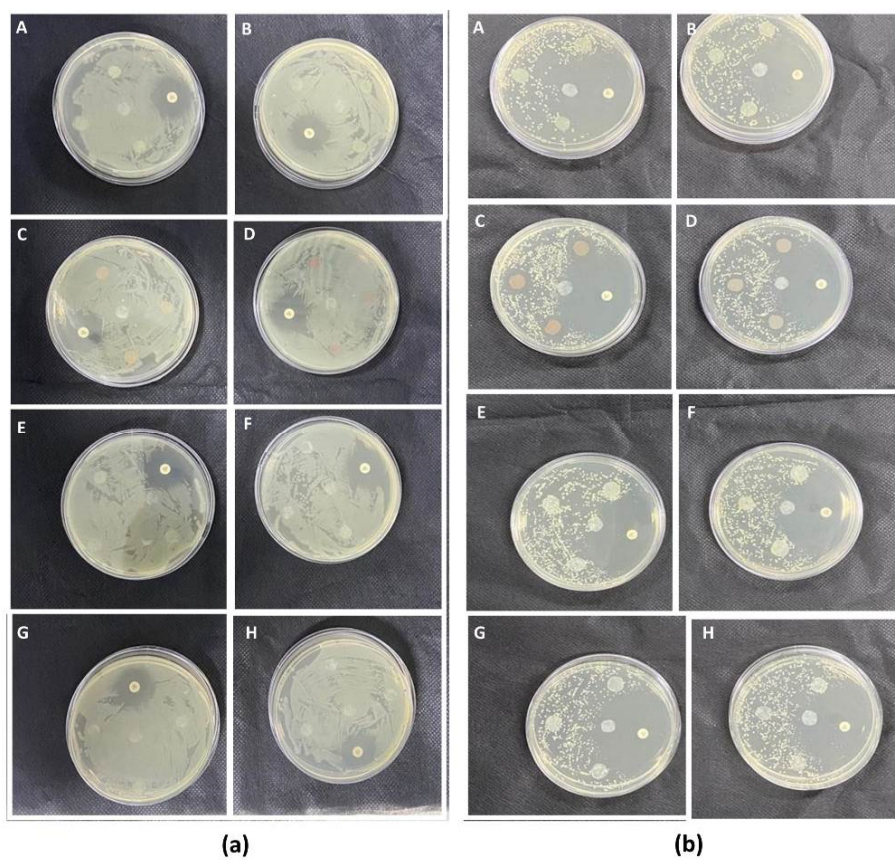

**Figure S20.** Analysis of the antimicrobial activity of the 8 active wound dressings developed (F2, F3, F4, F5, F6, F7, F8 and F9, referring to letters A, B, C, D, E, F, G and H, respectively): against (a) *E. coli* and (b) *S. aureus*.
